# Supplementary material
Source: PubMed Central journal article supplement (PMC5540055)

Supplementary Table 1: Lipid-related genetic variants associated with CAD risk at a Bonferroni-corrected level of significance

| SNP        | Nearest gene             | Association of variant with... [beta coefficient (standard error)] |                       |                      |                      |
|------------|--------------------------|--------------------------------------------------------------------|-----------------------|----------------------|----------------------|
|            |                          | LDL-c                                                              | HDL-c                 | Triglycerides        | CAD risk             |
| rs646776   | <i>CELSR2</i>            | <b>0.160 (0.004)</b>                                               | <b>-0.034 (0.004)</b> | 0.003 (0.004)        | <b>0.101 (0.011)</b> |
| rs1367117  | <i>APOB</i>              | <b>0.119 (0.004)</b>                                               | <b>-0.022 (0.004)</b> | <b>0.025 (0.004)</b> | <i>0.041 (0.011)</i> |
| rs515135   | <i>APOB</i>              | <b>0.139 (0.005)</b>                                               | -0.011 (0.004)        | <i>0.019 (0.004)</i> | <b>0.068 (0.012)</b> |
| rs6544713  | <i>ABCG8</i>             | <b>0.081 (0.004)</b>                                               | -0.003 (0.004)        | 0.013 (0.004)        | <i>0.051 (0.010)</i> |
| rs4148218  | <i>ABCG8</i>             | <b>0.044 (0.005)</b>                                               | -0.003 (0.004)        | 0.004 (0.004)        | <i>0.050 (0.012)</i> |
| rs4530754  | <i>CSNK1G3</i>           | <b>-0.028 (0.004)</b>                                              | -0.001 (0.003)        | -0.002 (0.003)       | <i>0.035 (0.009)</i> |
| rs998584   | <i>VEGFA</i>             | 0.000 (0.004)                                                      | <b>-0.026 (0.004)</b> | <b>0.029 (0.004)</b> | <i>0.042 (0.010)</i> |
| rs2297374  | <i>SLC22A1</i>           | <b>0.032 (0.004)</b>                                               | -0.006 (0.004)        | 0.009 (0.003)        | <i>0.038 (0.010)</i> |
| rs2954022  | <i>TRIB1</i>             | <b>0.055 (0.004)</b>                                               | <b>-0.040 (0.003)</b> | <b>0.078 (0.003)</b> | <i>0.043 (0.009)</i> |
| rs579459   | <i>ABO</i>               | <b>0.066 (0.004)</b>                                               | 0.014 (0.004)         | -0.014 (0.004)       | <b>0.073 (0.011)</b> |
| rs2068888  | <i>CYP26A1</i>           | <i>0.017 (0.004)</i>                                               | <b>-0.019 (0.004)</b> | <b>0.024 (0.003)</b> | <i>0.039 (0.010)</i> |
| rs12801636 | <i>PCNX3/<br/>PCNXL3</i> | -0.008 (0.004)                                                     | <b>-0.024 (0.004)</b> | <i>0.018 (0.004)</i> | <i>0.050 (0.011)</i> |
| rs653178   | <i>ATXN2</i>             | <b>-0.023 (0.004)</b>                                              | <b>-0.026 (0.004)</b> | 0.010 (0.003)        | <b>0.064 (0.010)</b> |
| rs1169288  | <i>HNF1A</i>             | <b>0.038 (0.004)</b>                                               | 0.010 (0.004)         | 0.002 (0.004)        | <i>0.047 (0.010)</i> |
| rs952044   | <i>Intergenic</i>        | -0.003 (0.004)                                                     | <b>-0.023 (0.004)</b> | 0.010 (0.004)        | <i>0.043 (0.010)</i> |
| rs6511720  | <i>LDLR</i>              | <b>0.221 (0.006)</b>                                               | <i>-0.025 (0.006)</i> | 0.008 (0.006)        | <b>0.125 (0.017)</b> |
| rs688      | <i>LDLR</i>              | <b>0.054 (0.004)</b>                                               | -0.011 (0.003)        | 0.004 (0.003)        | <i>0.037 (0.010)</i> |

SNPs are those associated with coronary artery disease (CAD) risk at a Bonferroni-corrected level of significance ( $p < 0.05/182 = 0.0003$ ). Associations with lipid fractions (low-density lipoprotein cholesterol [LDL-c], high-density lipoprotein cholesterol [HDL-c] and triglycerides) are in standard deviation units. Associations with age-related macular degeneration are log odds ratios from logistic regression analyses. Bold face indicates association at a genome-wide level of significance ( $p < 5 \times 10^{-8}$ ); italics indicates association at a Bonferroni-corrected level of significance. All variants are orientated to the CAD risk-increasing allele.

Supplementary Table 2: Lipid-related genetic variants associated with ALZ risk at a Bonferroni-corrected level of significance

| SNP        | Nearest gene | Association of variant with... [beta coefficient (standard error)] |                       |                       |                      |
|------------|--------------|--------------------------------------------------------------------|-----------------------|-----------------------|----------------------|
|            |              | LDL-c                                                              | HDL-c                 | Triglycerides         | ALZ risk             |
| rs1883025  | <i>ABCA1</i> | <b>-0.030 (0.004)</b>                                              | <b>-0.070 (0.004)</b> | <b>-0.022 (0.004)</b> | <i>0.070 (0.018)</i> |
| rs17788930 | <i>FNBP4</i> | 0.005 (0.004)                                                      | <b>0.036 (0.004)</b>  | -0.011 (0.004)        | <i>0.070 (0.016)</i> |
| rs6859     | <i>APOC</i>  | <b>0.084 (0.004)</b>                                               | <b>-0.018 (0.004)</b> | <i>0.014 (0.004)</i>  | <b>0.334 (0.016)</b> |
| rs7254892  | <i>APOC</i>  | <b>0.485 (0.012)</b>                                               | <i>-0.053 (0.011)</i> | <b>-0.124 (0.011)</b> | <i>0.250 (0.057)</i> |

SNPs are those associated with Alzheimer's disease (ALZ) risk at a Bonferroni-corrected level of significance ( $p < 0.05/182 = 0.0003$ ). Associations with lipid fractions (low-density lipoprotein cholesterol [LDL-c], high-density lipoprotein cholesterol [HDL-c] and triglycerides) are in standard deviation units. Associations with age-related macular degeneration are log odds ratios from logistic regression analyses. Bold face indicates association at a genome-wide level of significance ( $p < 5 \times 10^{-8}$ ); italics indicates association at a Bonferroni-corrected level of significance. All variants are orientated to the Alzheimer's disease risk-increasing allele.

Supplementary Figure 1: Genetic associations with lipid fractions and disease outcomes

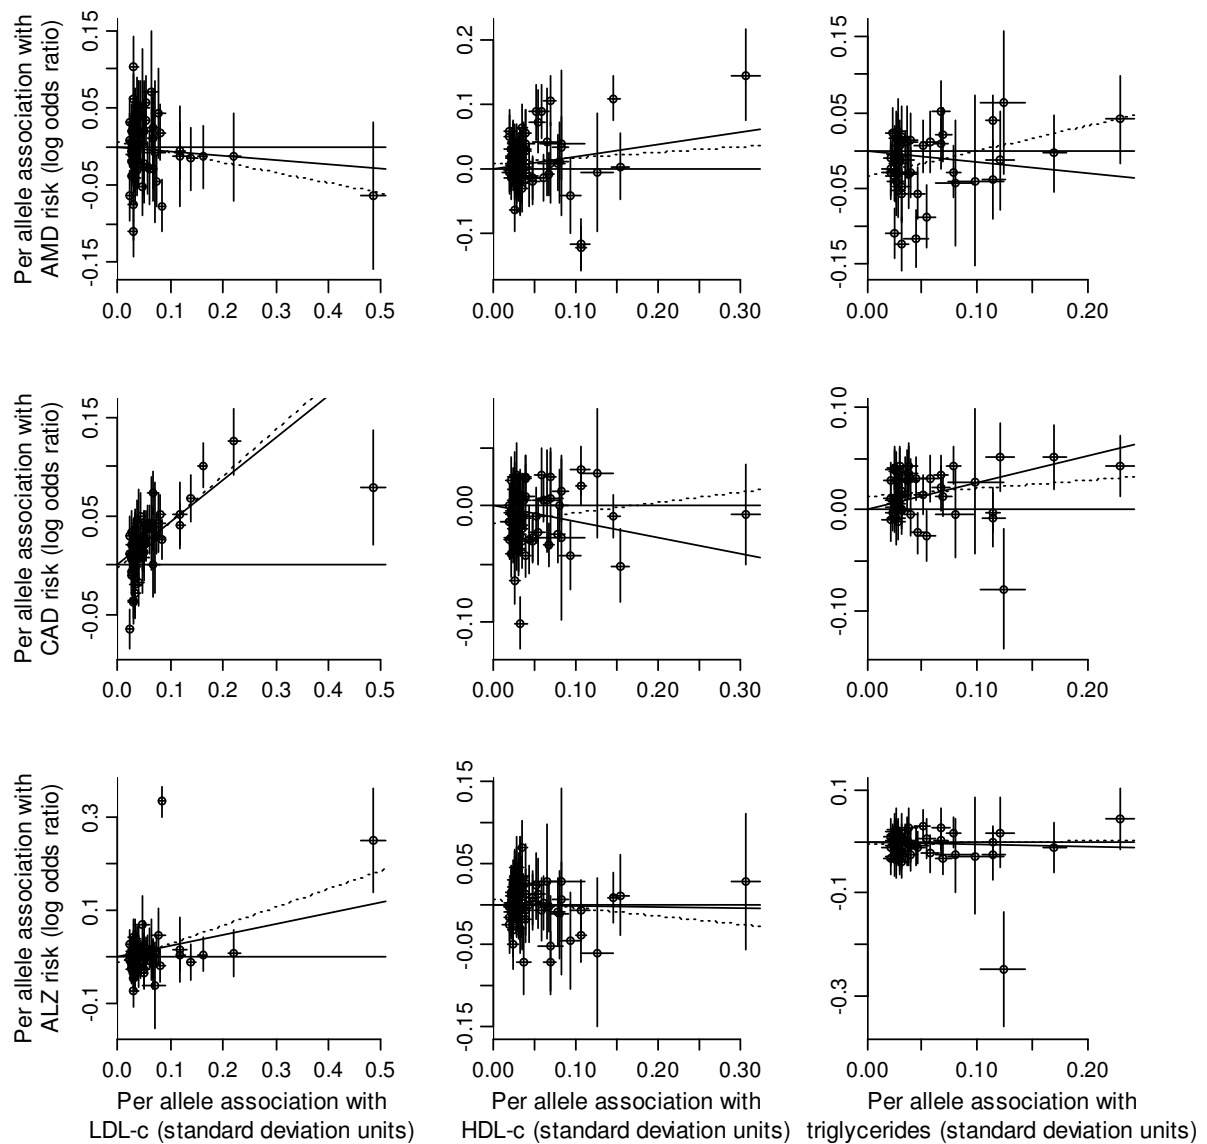

Genetic associations for all variants associated with the lipid fraction at a genome-wide level of significance ( $p < 5 \times 10^{-8}$ ). Each point represents a single genetic variant, lines are 95% confidence intervals for the associations. The solid line is the inverse-variance weighted estimate, the dotted line is the MR-Egger estimate. This figure is also available as an interactive graph online at [http://mendelianrandomization.com/amd\\_lipids\\_motionchart.htm](http://mendelianrandomization.com/amd_lipids_motionchart.htm).

Supplementary Figure 2: Distribution of causal estimates from univariable Mendelian randomization analysis of HDL-cholesterol on AMD risk on omission of 30% of the variants from the analysis at random based on 1 million iterations

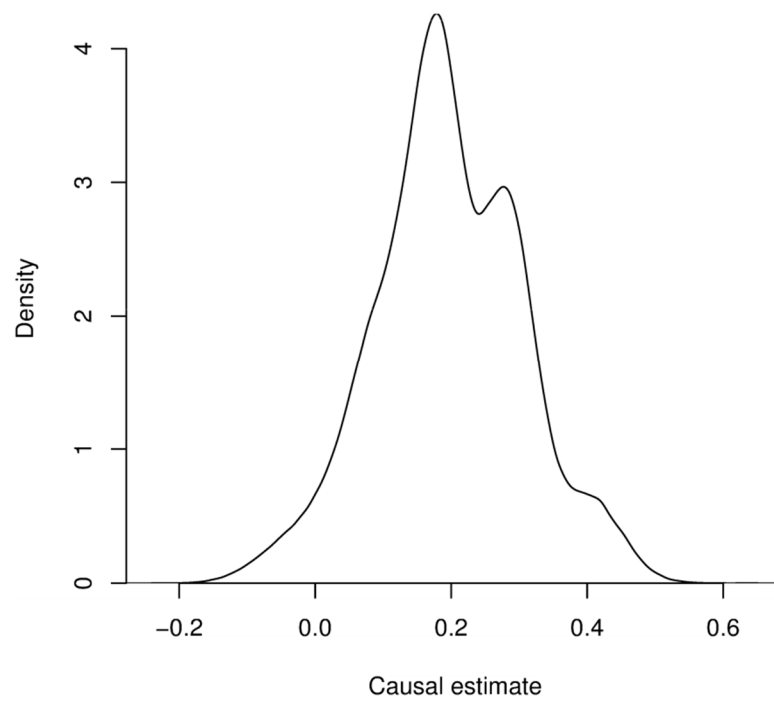

Supplement: mmc1.pdf [file mmc1.pdf]
